# Supplementary material for: Trajectories of Nicotine and Cannabis Vaping and Polyuse From Adolescence to Young Adulthood
Source: PubMed Central journal article supplement (PMC7539114; doi:10.1001/jamanetworkopen.2020.19181), 2020-10-06
Supplement: jamanetwopen-e2019181-s001.pdf [file jamanetwopen-e2019181-s001.pdf]

## Supplemental Online Content

Lanza HI, Barrington-Trimis JL, McConnell R, et al. Trajectories of Nicotine and Cannabis Vaping and Polyuse From Adolescence to Young Adulthood. *JAMA Netw Open*. 2020;3(10):e2019181. doi:10.1001/jamanetworkopen.2020.19181

**eTable 1.** Correlations between nicotine vaping and nicotine cannabis across waves

**eTable 2.** Model fit indices for nicotine vaping trajectories

This supplemental material has been provided by the authors to give readers additional information about their work.

**eTable 1.** Correlations between nicotine vaping and nicotine cannabis across waves

|             | Nicotine W5 | Nicotine W6 | Nicotine W7 | Nicotine W8 | Nicotine W9 | Cannabis W5 | Cannabis W6 | Cannabis W7 | Cannabis W8 | Cannabis W9 |
|-------------|-------------|-------------|-------------|-------------|-------------|-------------|-------------|-------------|-------------|-------------|
| Nicotine W5 |             |             |             |             |             | .42         | .17         | .17         | .17         | .08         |
| Nicotine W6 | .42         |             |             |             |             | .24         | .36         | .14         | .19         | .14         |
| Nicotine W7 | .44         | .52         |             |             |             | .16         | .13         | .32         | .11         | .09         |
| Nicotine W8 | .36         | .49         | .53         |             |             | .18         | .17         | .10         | .30         | .12         |
| Nicotine W9 | .21         | .21         | .22         | .26         |             | .10         | .12         | .11         | .17         | .34         |
| Cannabis W5 |             |             |             |             |             |             |             |             |             |             |
| Cannabis W6 |             |             |             |             |             | .44         |             |             |             |             |
| Cannabis W7 |             |             |             |             |             | .29         | .36         |             |             |             |
| Cannabis W8 |             |             |             |             |             | .33         | .42         | .30         |             |             |
| Cannabis W9 |             |             |             |             |             | .10         | .19         | .18         | .26         |             |

W5: Wave 1 – fall 11<sup>th</sup> grade; W6: Wave 2 – spring 11<sup>th</sup> grade; W7: Wave 3 – fall 12<sup>th</sup> grade; W8: Wave 4 – spring of 12<sup>th</sup> grade; W9: Wave 9 – young adulthood.

All correlations significant at  $p < .01$ .

| <b>eTable 2. Model fit indices for nicotine vaping trajectories</b>                                                                                                                                                                                                                                                                                                                           |                |                 |                  |                           |                  |                                                                   |         |
|-----------------------------------------------------------------------------------------------------------------------------------------------------------------------------------------------------------------------------------------------------------------------------------------------------------------------------------------------------------------------------------------------|----------------|-----------------|------------------|---------------------------|------------------|-------------------------------------------------------------------|---------|
| Trajectories                                                                                                                                                                                                                                                                                                                                                                                  | Log Likelihood | Free Parameters | BIC <sup>a</sup> | Adjusted BIC <sup>b</sup> | AIC <sup>c</sup> | LMR LRT <i>p</i> -value for <i>k</i> -1 <sup>d</sup>              | Entropy |
| 1                                                                                                                                                                                                                                                                                                                                                                                             | -12460.22      | 8               | 24985.30         | 24959.88                  | 24936.43         | N/A                                                               | N/A     |
| 2                                                                                                                                                                                                                                                                                                                                                                                             | -9174.33       | 12              | 18445.95         | 18407.82                  | 18372.65         | < .001                                                            | .31     |
| 3                                                                                                                                                                                                                                                                                                                                                                                             | -8459.55       | 16              | 17048.83         | 16997.99                  | 16951.11         | <.01                                                              | .30     |
| 4                                                                                                                                                                                                                                                                                                                                                                                             | -8171.14       | 20              | 16504.44         | 16440.89                  | 16382.28         | .22                                                               | .31     |
| 5                                                                                                                                                                                                                                                                                                                                                                                             | -7791.94       | 24              | 15778.47         | 15702.22                  | 15631.88         | <.001                                                             | .77     |
| 6                                                                                                                                                                                                                                                                                                                                                                                             | -7668.79       | 28              | 15804.61         | 15675.64                  | 15603.58         | .09                                                               | .77     |
| <b>Model fit indices for cannabis vaping trajectories</b>                                                                                                                                                                                                                                                                                                                                     |                |                 |                  |                           |                  |                                                                   |         |
| Trajectories                                                                                                                                                                                                                                                                                                                                                                                  | Log Likelihood | Free Parameters | BIC <sup>a</sup> | Adjusted BIC              | AIC <sup>b</sup> | LMR LRT <sup>c</sup> <i>p</i> -value for <i>k</i> -1 <sup>d</sup> | Entropy |
| 1                                                                                                                                                                                                                                                                                                                                                                                             | -12195.19      | 8               | 24455.23         | 24429.81                  | 24406.37         | N/A                                                               | N/A     |
| 2                                                                                                                                                                                                                                                                                                                                                                                             | -9358.75       | 12              | 18814.79         | 18776.66                  | 18741.50         | < .001                                                            | .35     |
| 3                                                                                                                                                                                                                                                                                                                                                                                             | -8870.29       | 16              | 17870.29         | 17819.45                  | 17772.58         | .08                                                               | .33     |
| 4                                                                                                                                                                                                                                                                                                                                                                                             | -8508.47       | 20              | 17179.08         | 17115.53                  | 17056.94         | < .001                                                            | .74     |
| 5                                                                                                                                                                                                                                                                                                                                                                                             | -8254.20       | 24              | 16702.97         | 16626.72                  | 16556.40         | .04                                                               | .74     |
| 6                                                                                                                                                                                                                                                                                                                                                                                             | -8155.05       | 28              | 16737.11         | 16548.14                  | 16516.10         | .20                                                               | .74     |
| <sup>a</sup> BIC = Bayesian information criterion; <sup>b</sup> sample-size adjusted Bayesian information criterion; <sup>c</sup> AIC = Akaike information criterion; <sup>d</sup> LMR LRT = Lo-Mendell-Rubin likelihood ratio test, <i>p</i> -value for <i>k</i> -1 refers to significant improvement in model fit between the class ( <i>k</i> ) and the class preceding it ( <i>k</i> -1). |                |                 |                  |                           |                  |                                                                   |         |
